# Supplementary material
Source: PubMed Central journal article supplement (PMC7438239)
Supplement: NIHMS1568742-supplement-3.pdf [file NIHMS1568742-supplement-3.pdf]

String-db protein-protein interaction analysis<sup>5, 6</sup> using the top 200 DEGs. Figure shows the genes whose products interact with each other. Interactions in string-db include both direct (physical) and indirect (functional) interactions, derived from systematic co-expression analysis, detection of shared selective signals across genomes, automated text-mining of the scientific literature, and computational transfer of interaction knowledge between organisms based on gene ontology.
