# Supplementary material
Source: PubMed Central journal article supplement (PMC7438239)
Supplement: NIHMS1568742-supplement-5.pdf [file NIHMS1568742-supplement-5.pdf]

**Figure E5 – Replication of prediction analysis in the independent cohorts**

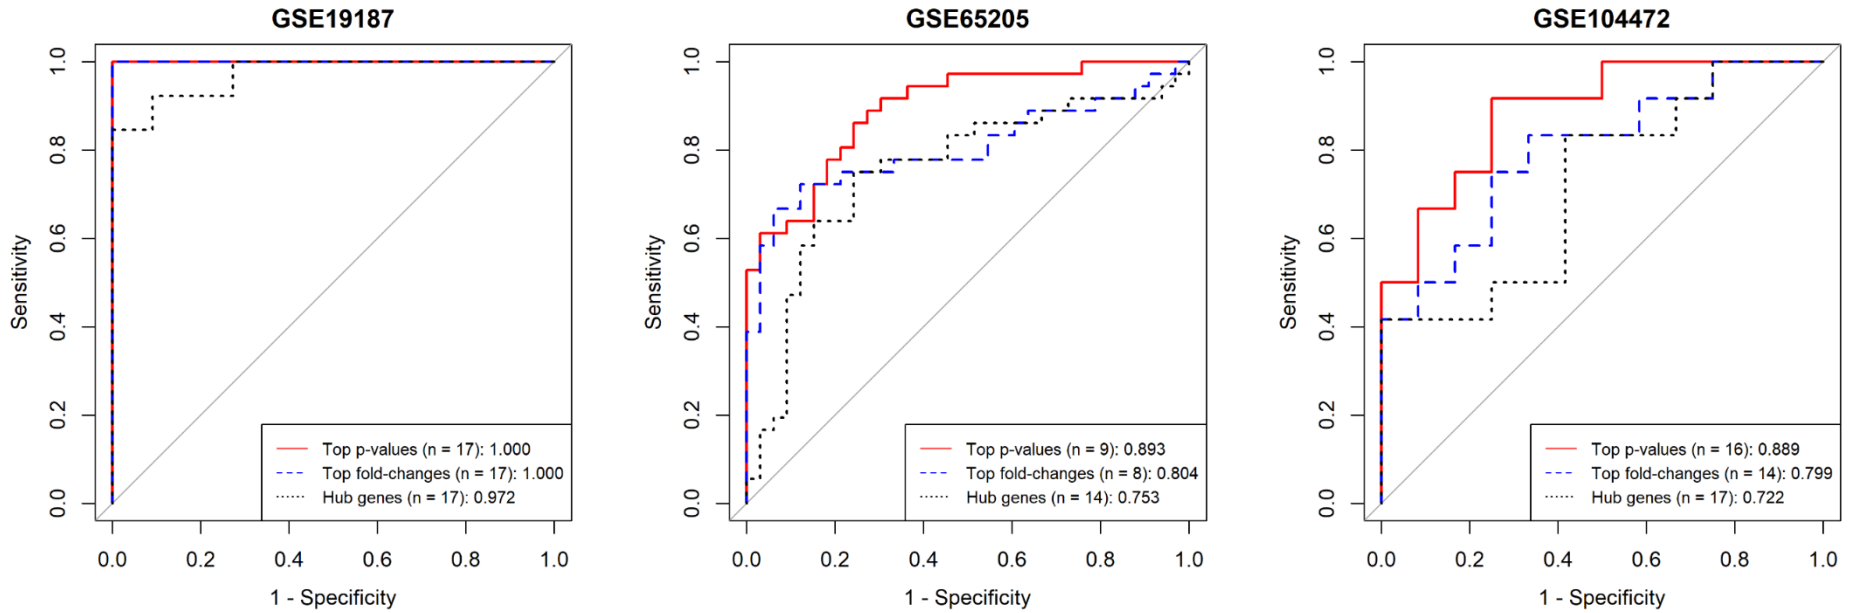

Replication performed using the logistic regression models derived from the discovery cohort (EVAPR), including the genes selected and their regression coefficients. Red continuous line = top 17 genes by p-value; blue dashed line = top 17 genes by effect size; black dotted line = 17 “hub” genes. See Table E10 for classification tables.
